# Supplementary material for: Efficient and accurate KIR and HLA genotyping with massively parallel sequencing data
Source: HighWire-hosted journal article supplement (doi:10.1101/gr.277585.122), 2023-05-11

Figure S1: Allele similarity of the mRNA sequences extracted from IPD-KIR and IPD-IMGT/HLA database. Each gene has up to three representative alleles in the heatmap. The color shows the sequence similarity estimated from minimap2 (with -x ava-pb). Only upper triangular portion is colored, and the grey color in upper triangle indicates that minimap2 can not find good alignment between two sequences.

(a) KIR allele similarity

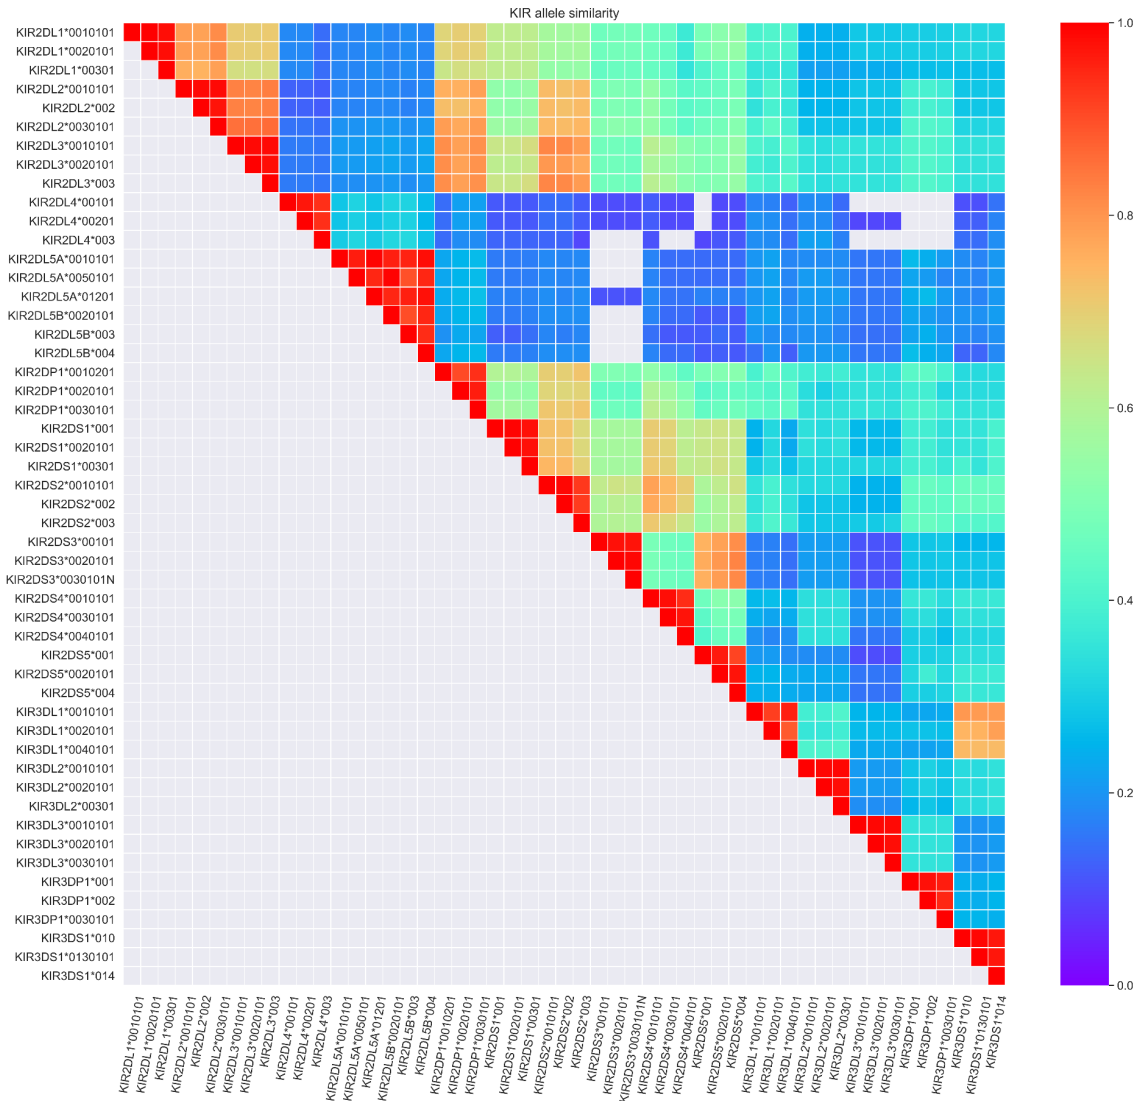

(b) HLA allele similarity

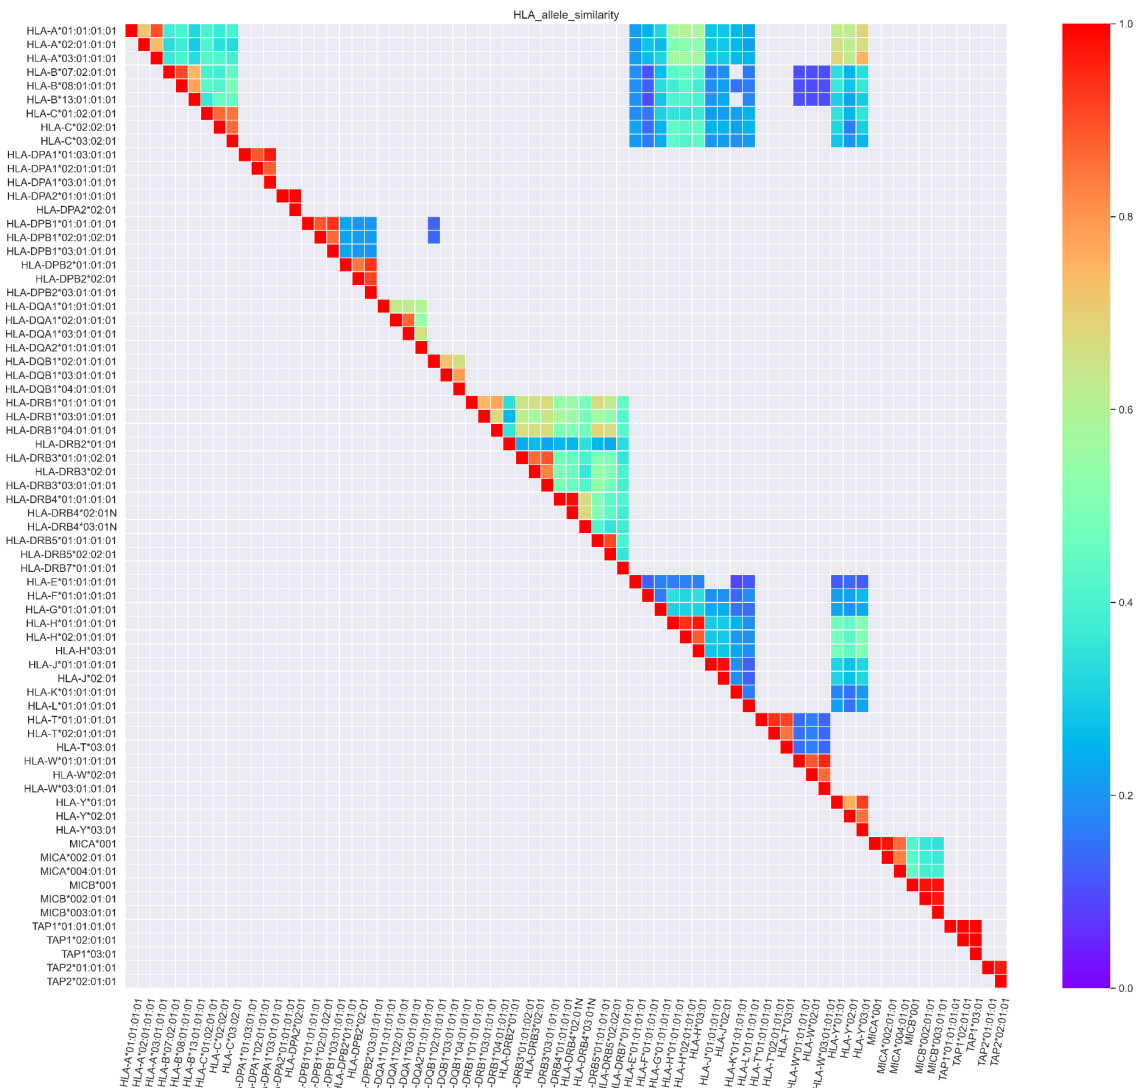

Figure S2. KIR allele calling accuracy when varying the dominant allele fraction threshold (`--frac` option in T1K) in the simulated data

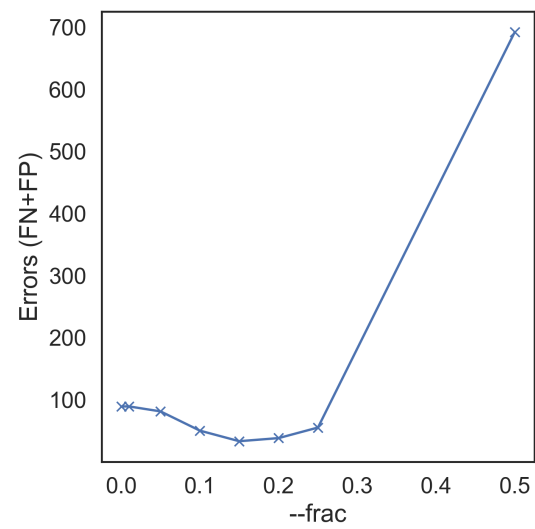

Figure S3. Evaluation of the unambiguous SNPs identified in T1K on the HPRC samples  
The accuracy is 95.0% (57 validated SNPs over 60 total unambiguous SNPs).

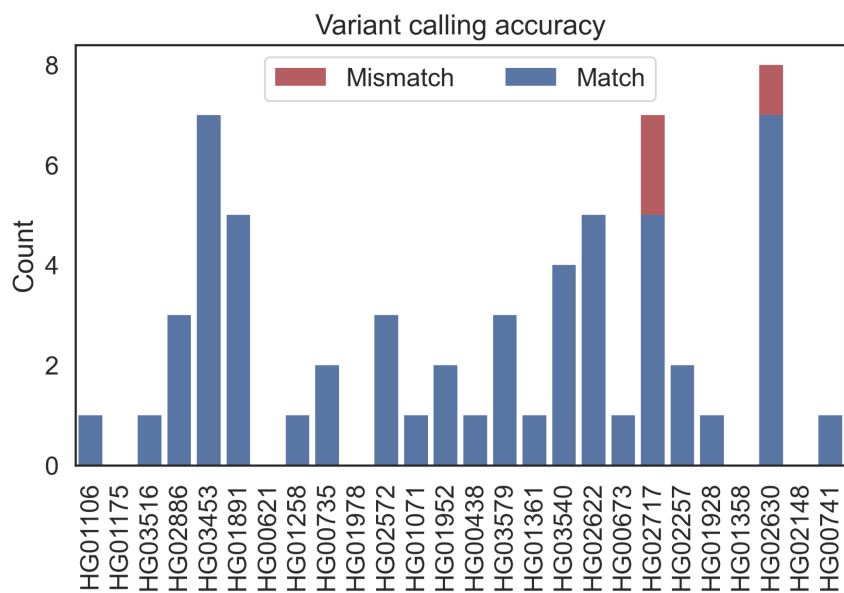

Figure S4. The multiple sequence alignments of HLA-A\*02:01:01:01, HLA-A\*02:783 and HLA-U\*01:03's genomes, focusing on the exon 3 and 4 region of the HLA-A alleles. Blue rectangles mark the exon regions. Red rectangles mark the bases that are the same in HLA-A\*02:783 and HLA-U\*01:03, which create a 155bp exact match between these two alleles. This alignment was generated by <https://www.ebi.ac.uk/Tools/msa/clustalo/>.

|                   |                                                              |      |
|-------------------|--------------------------------------------------------------|------|
| HLA-A*02:01:01:01 | GGACCGCGGCGGACATGGCAGCTCAGACCACCAAGCACAAGTGGGAGGCGGCCCATGTGG | 1200 |
| HLA-A*02:783      | GGACCGCGGCGGACATGGCAGCTCAGACCACCAAGCACAAGTGGGAGGCGGCCCATGTGG | 1200 |
| HLA-U*01:03       | GGACCGCGGCGGCCATGGCGGCTCAGATTACCCAGCGCAAGTGGGAGGCGGCCCATGAGG | 147  |
| *****             |                                                              |      |
| HLA-A*02:01:01:01 | CGGAGCAGTTGAGAGCCTACCTGGAGGGCAGCTGCGTGGAGTGGCTCCGCAGATACCTGG | 1260 |
| HLA-A*02:783      | CGGAGCAGTTGAGAGCCTACCTGGAGGGCAGCTGCGTGGAGTGGCTCCGCAGATACCTGG | 1260 |
| HLA-U*01:03       | CGGAGCAGCAGAGAGCCTACCTGGAGGGCAGCTGCGTGGAGTGGCTCCGCAGATACCTGG | 207  |
| *****             |                                                              |      |
| HLA-A*02:01:01:01 | AGAACCGGAAGGAGACGCTGCAGCGCACGG                               | 1320 |
| HLA-A*02:783      | AGAACCGGAAGGAGATGCTGCAGCGCACCTG                              | 1320 |
| HLA-U*01:03       | AGAACCGGAAGGAGATGCTGCAGCGCACCTG                              | 267  |
| *****             |                                                              |      |
| HLA-A*02:01:01:01 | CGCCTGTAGATCTCCCGGGCTGGCCTCCCAAGAGGGGAGACAATTGGGACCAACACT    | 1380 |
| HLA-A*02:783      | CGCCTGTAGATCTCCCGGGCTGGCCTCCCAAGAGGGGAGACAATTGGGACCAACACT    | 1380 |
| HLA-U*01:03       | CGCCTGTAGATCTCCCGGGCTGGCCTCCCAAGAGGGGAGACAGATGGGACCAACACT    | 327  |
| *****             |                                                              |      |
| HLA-A*02:01:01:01 | AGAATATCGCCCTCCCTCTGGTCTGAGGGAGAGGAATCCTCTGGGTTTCCAGATCCTG   | 1440 |
| HLA-A*02:783      | AGAATATCGCCCTCCCTCTGGTCTGAGGGAGAGGAATCCTCTGGGTTTCCAGATCCTG   | 1440 |
| HLA-U*01:03       | AGAATATCACCTCCCTCTGGTCTGAGGGAGAGAAGAACTCCTCTGGGTTTCCAGATCCTG | 387  |
| *****             |                                                              |      |
| HLA-A*02:01:01:01 | TACCAGAGAGTGACTCTGAGGTTCCGCCCTGCTCTCTGACACAATTAAGGGATAAAATCT | 1500 |
| HLA-A*02:783      | TACCAGAGAGTGACTCTGAGGTTCCGCCCTGCTCTCTGACACAATTAAGGGATAAAATCT | 1500 |
| HLA-U*01:03       | TACCAGAGAGTGACTCTGAGGTTCCACCCTGCTCTCTGACACAATTAAGGGATAAAATCT | 447  |
| *****             |                                                              |      |
| HLA-A*02:01:01:01 | CTGAAGGAATGACGGGAAGACGATCCCTCGAATACTGATGAGTGGTTCCTTTGACACAC  | 1560 |
| HLA-A*02:783      | CTGAAGGAATGACGGGAAGACGATCCCTCGAATACTGATGAGTGGTTCCTTTGACACAC  | 1560 |
| HLA-U*01:03       | CTGAGGCAATGACGGGAAGACGCAATTAAGGGATAAAATCTCTGAGGGAATGACTGGAAG | 507  |
| **** * ***** *    |                                                              |      |
| HLA-A*02:01:01:01 | ACAGGCAGCAGCCTTGG--GCCCGTGACTTTTCCTCTCAGGCCTTGTCTCTGCTTCACA  | 1618 |
| HLA-A*02:783      | ACAGGCAGCAGCCTTGG--GCCCGTGACTTTTCCTCTCAGGCCTTGTCTCTGCTTCACA  | 1618 |
| HLA-U*01:03       | ACGATCCCTCATTTAGTGATCCCAAGTCACATAAATTT-GGGGGTAGTTTGTACACAGCA | 566  |
| ** * * * * *      |                                                              |      |
| HLA-A*02:01:01:01 | CTCAATGTGTGTGGGGGTCTGAGTCCAGCACTTCTGAGTCCCTCAGCCTCCACTCAGGTC | 1678 |
| HLA-A*02:783      | CTCAATGTGTGTGGGGGTCTGAGTCCAGCACTTCTGAGTCCCTCAGCCTCCACTCAGGTC | 1678 |
| HLA-U*01:03       | ATGGATAAC-----TAATGAAGCCCT-----                              | 587  |
| * ** * * *        |                                                              |      |
| HLA-A*02:01:01:01 | AGGACCAGAAGTCGCTGTTCCCTCTTCAGGGACTAGAATTTTCCACGGAATAGGAGATTA | 1738 |
| HLA-A*02:783      | AGGACCAGAAGTCGCTGTTCCCTCTTCAGGGACTAGAATTTTCCACGGAATAGGAGATTA | 1738 |
| HLA-U*01:03       | -----                                                        | 587  |
| *****             |                                                              |      |
| HLA-A*02:01:01:01 | TCCCAGGTGCCTGTGTCCAGGCTGGTGTCTGGGTTCTGTGCTCCCTTCCCCATCCCAGGT | 1798 |
| HLA-A*02:783      | TCCCAGGTGCCTGTGTCCAGGCTGGTGTCTGGGTTCTGTGCTCCCTTCCCCATCCCAGGT | 1798 |
| HLA-U*01:03       | -----                                                        | 587  |
| *****             |                                                              |      |
| HLA-A*02:01:01:01 | GTCCTGTCCATTCTCAAGATAGCCACATGTGTGCTGGAGGAGTGTCCCATGACAGATGCA | 1858 |
| HLA-A*02:783      | GTCCTGTCCATTCTCAAGATAGCCACATGTGTGCTGGAGGAGTGTCCCATGACAGATGCA | 1858 |
| HLA-U*01:03       | -----                                                        | 587  |
| *****             |                                                              |      |
| HLA-A*02:01:01:01 | AAATGCCTGAATGATCTGACTCTTCCTGACACACGCCCCCAAACGCATATGACTCACCA  | 1918 |
| HLA-A*02:783      | AAATGCCTGAATGATCTGACTCTTCCTGACACACGCCCCCAAACGCATATGACTCACCA  | 1918 |
| HLA-U*01:03       | -----                                                        | 587  |

Figure S5. KIR allele expression (FPK) in Smart-seq scRNA-seq samples on 29 immune cells. Each heatmap corresponds to one donor.

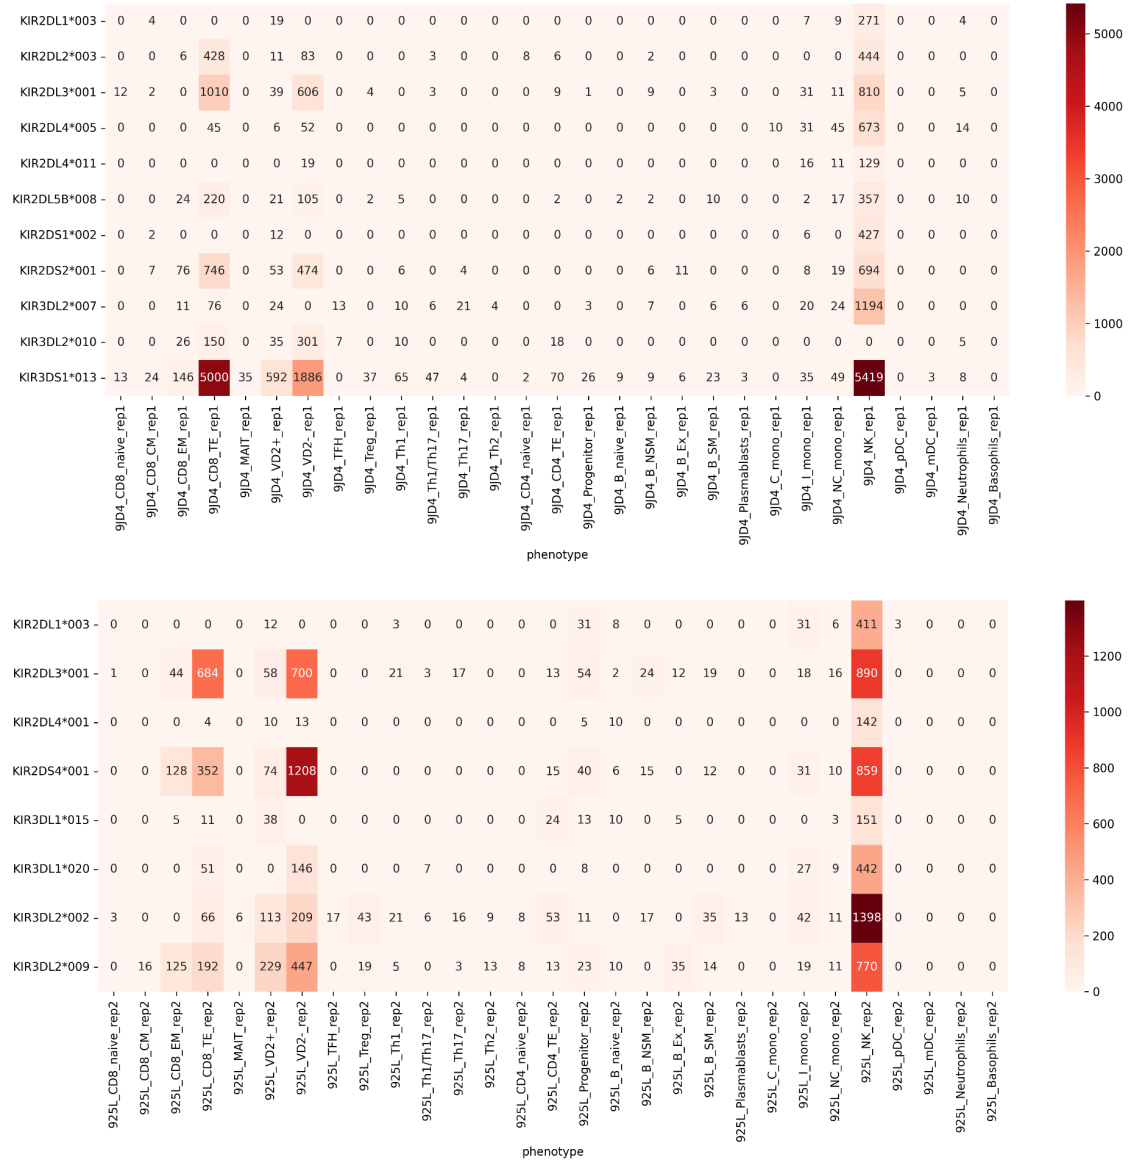

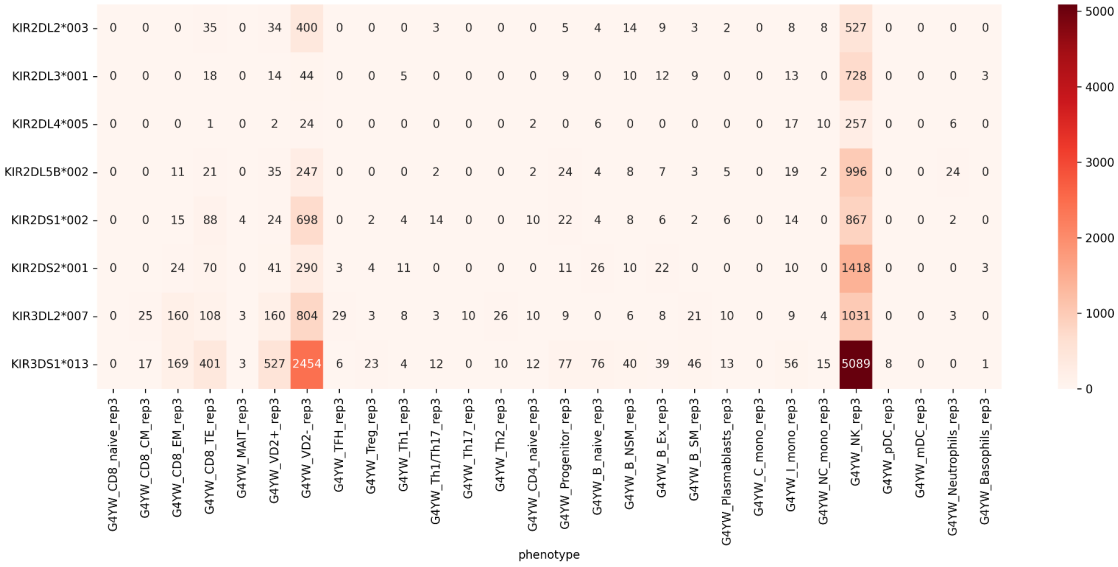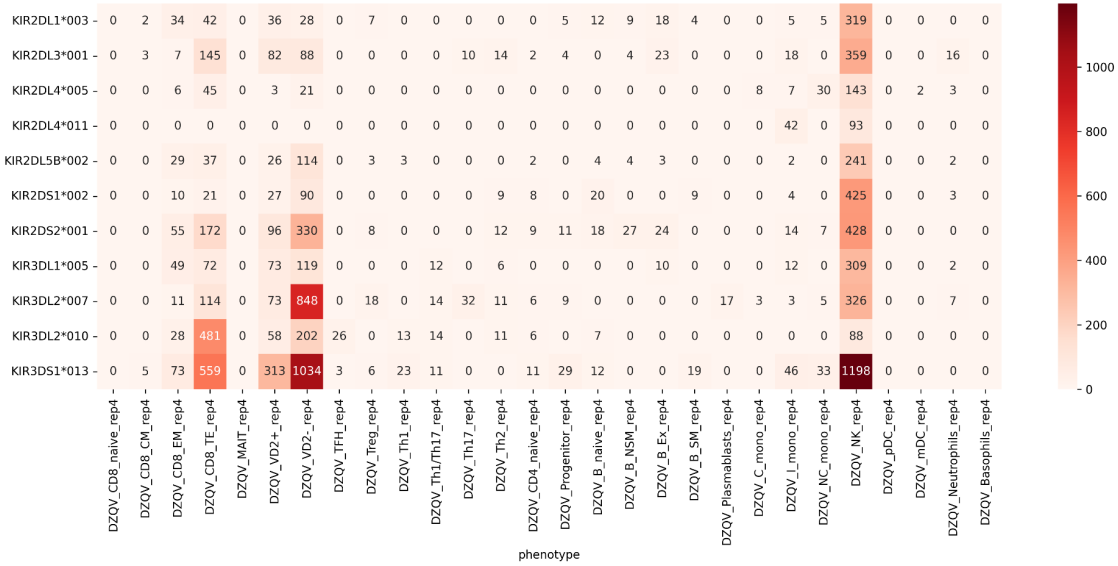

Figure S6. KIR allele expression (FPK) in Smart-seq scRNA-seq samples on CD8+ T cells. Each heatmap corresponds to the cells bearing the same set of HLA class I genes. Donor 8 is the example in Figure 2A.

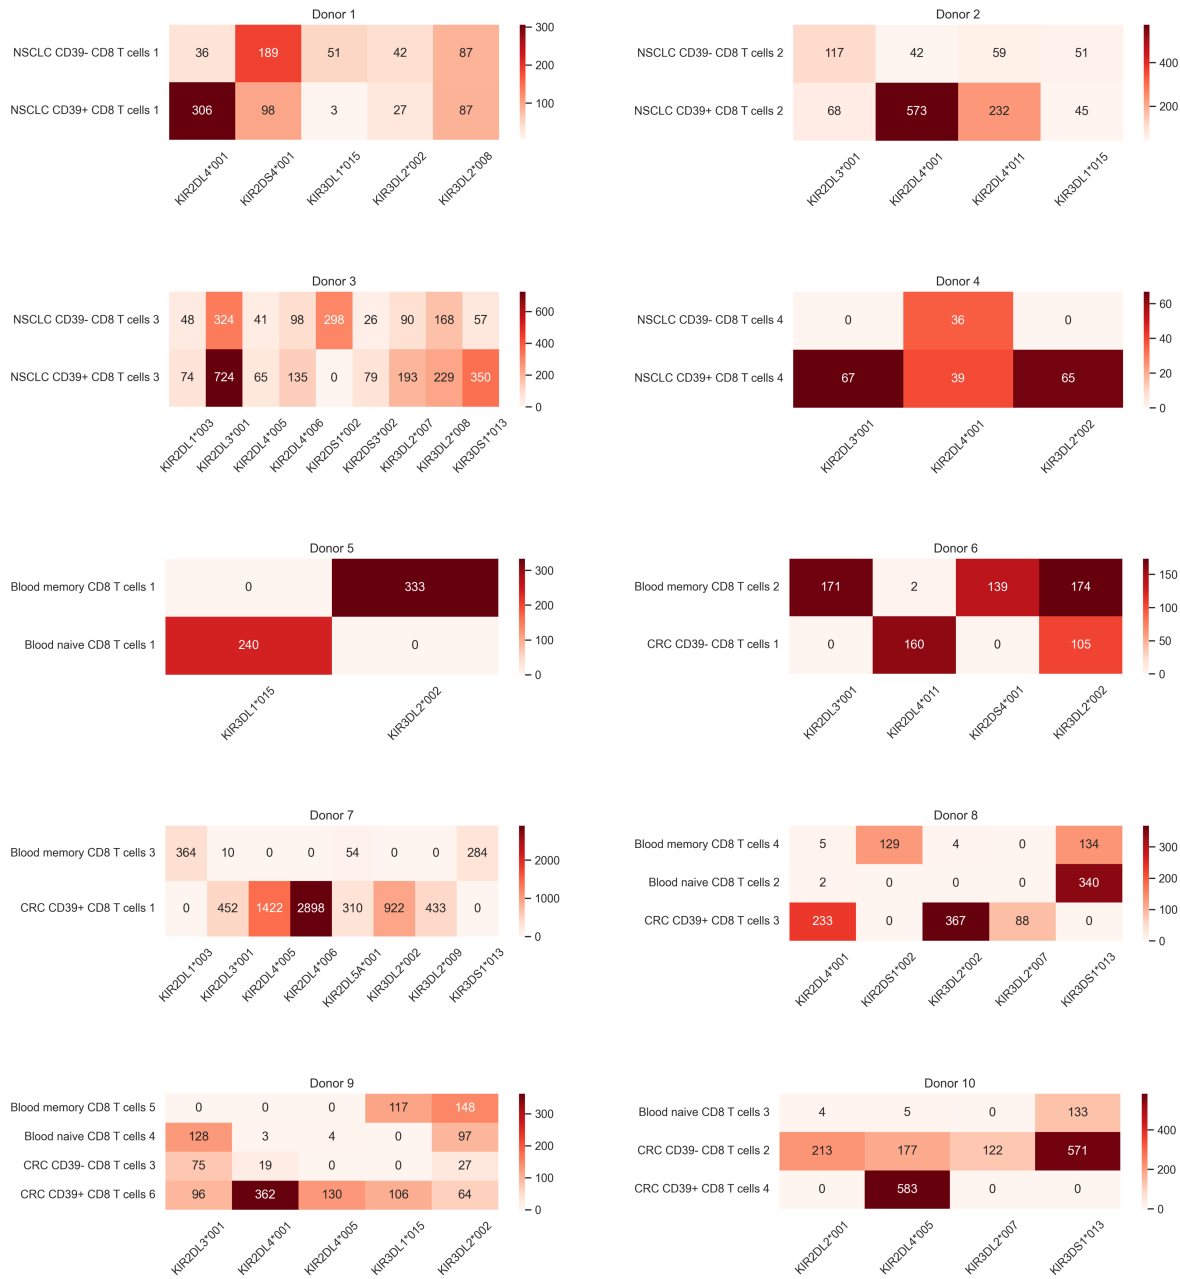



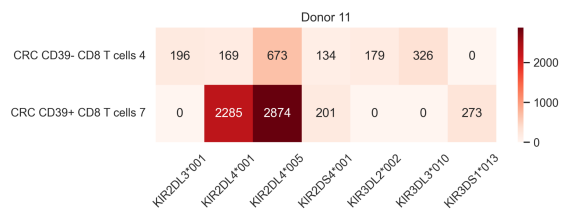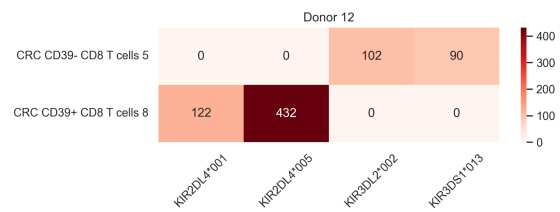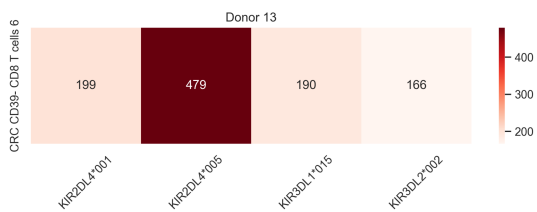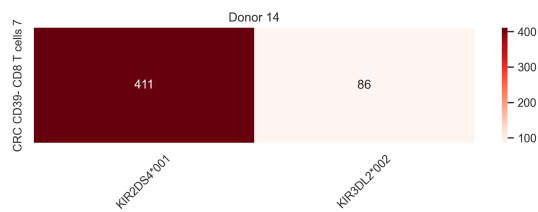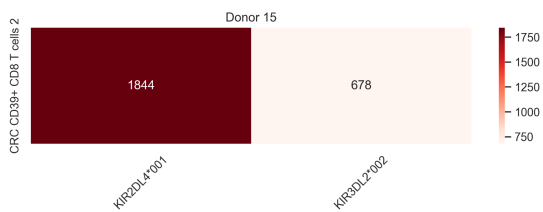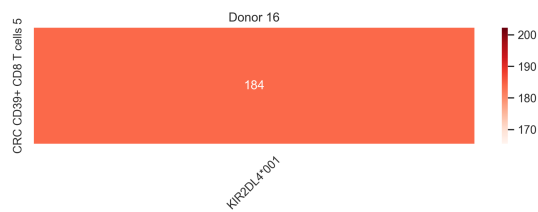

Figure S7. Illustration of the novel SNP identification procedure  
 Green and yellow boxes represent the allele-specific variations. Red dots represent mismatches on the read alignments. The third combination with the orange star is the final SNP result that can improve all five alignments with only one introduced SNP.

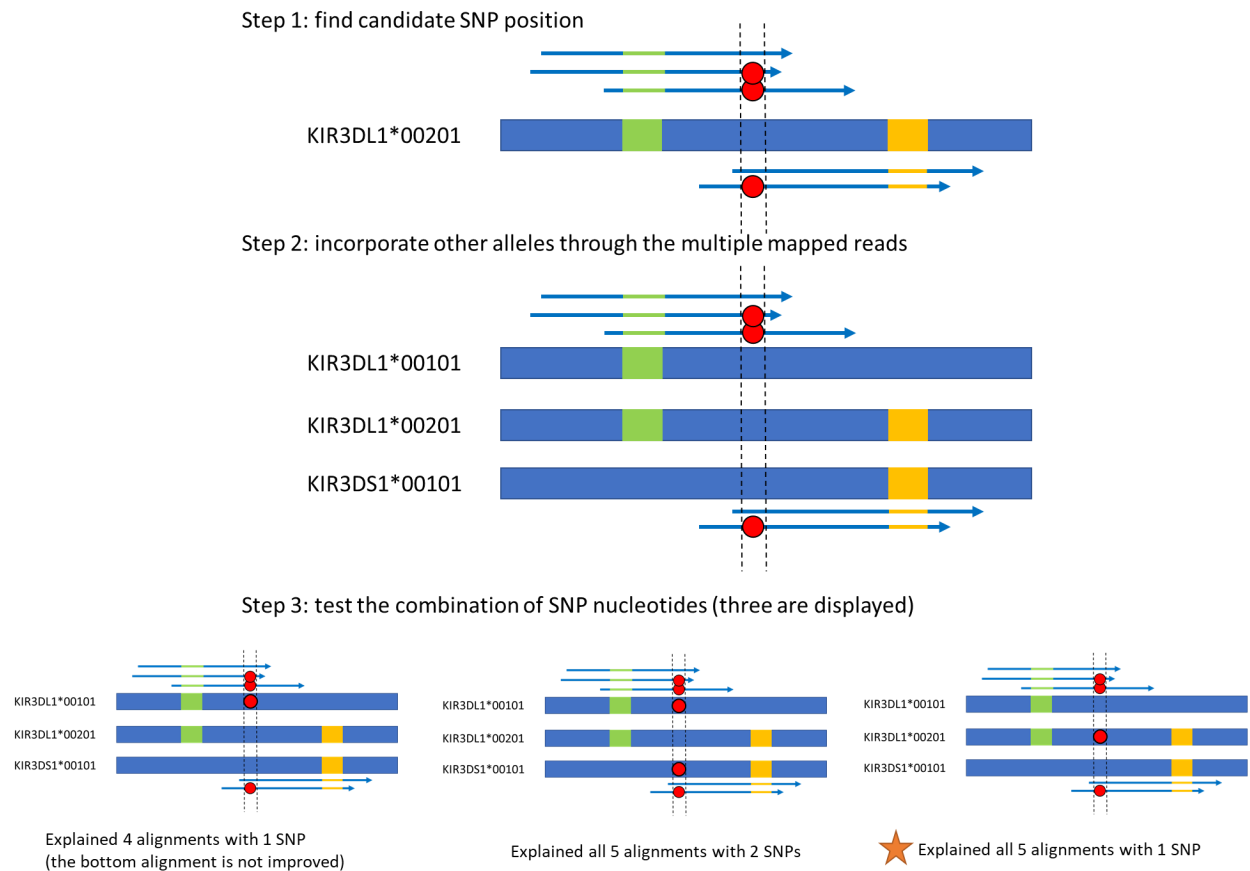

Supplement: Supplementary_Figures.pdf [file Supplementary_Figures.pdf]
