# Supplementary material for: Efficient and accurate KIR and HLA genotyping with massively parallel sequencing data
Source: HighWire-hosted journal article supplement (doi:10.1101/gr.277585.122), 2023-05-11
Supplement: Supplementary_Tables.docx [file Supplementary_Tables.docx]

Table S1. 1000 Genome Project samples used in the *KIR3DL2* and HLA allele prediction evaluation. These are the samples with both RNA-seq and WES data.

NA18486,NA18487,NA18488,NA18489,NA18498,NA18499,NA18502,NA18505,NA18508,NA18510,NA18511,NA18517,NA18519,NA18520,NA18858,NA18861,NA18867,NA18868,NA18870,NA18873,NA18907,NA18908,NA18909,NA18910,NA18912,NA18916,NA18917,NA18923,NA18933,NA18934,NA19092,NA19093,NA19095,NA19096,NA19098,NA19099,NA19102,NA19107,NA19108,NA19113,NA19114,NA19116,NA19117,NA19118,NA19119,NA19121,NA19129,NA19130,NA19131,NA19137,NA19138,NA19141,NA19143,NA19144,NA19146,NA19147,NA19149,NA19150,NA19152,NA19153,NA19159,NA19160,NA19171,NA19172,NA19175,NA19184,NA19185,NA19189,NA19190,NA19197,NA19198,NA19200,NA19201,NA19204,NA19206,NA19207,NA19209,NA19210,NA19213,NA19214,NA19222,NA19223,NA19225,NA19235,NA19236,NA19247,NA19248,NA19256,NA19257,NA06984,NA06985,NA06986,NA06989,NA06994,NA07000,NA07037,NA07048,NA07051,NA07056,NA07347,NA07357,NA10847,NA10851,NA11829,NA11830,NA11831,NA11832,NA11840,NA11843,NA11881,NA11892,NA11893,NA11894,NA11918,NA11920,NA11930,NA11931,NA11992,NA11993,NA11994,NA11995,NA12004,NA12005,NA12006,NA12043,NA12044,NA12045,NA12058,NA12144,NA12154,NA12155,NA12156,NA12234,NA12249,NA12272,NA12273,NA12275,NA12282,NA12283,NA12286,NA12287,NA12340,NA12341,NA12342,NA12347,NA12348,NA12383,NA12399,NA12400,NA12413,NA12489,NA12546,NA12716,NA12717,NA12718,NA12749,NA12750,NA12751,NA12760,NA12761,NA12762,NA12763,NA12775,NA12776,NA12777,NA12778,NA12812,NA12813,NA12814,NA12815,NA12827,NA12829,NA12830,NA12842,NA12843,NA12872,NA12873,NA12874,NA12889,NA12890,HG00171,HG00173,HG00174,HG00176,HG00177,HG00178,HG00179,HG00180,HG00181,HG00182,HG00183,HG00185,HG00186,HG00187,HG00188,HG00189,HG00266,HG00267,HG00268,HG00269,HG00271,HG00272,HG00273,HG00274,HG00275,HG00276,HG00277,HG00278,HG00280,HG00281,HG00282,HG00284,HG00285,HG00306,HG00308,HG00309,HG00310,HG00311,HG00312,HG00313,HG00315,HG00319,HG00320,HG00321,HG00323,HG00324,HG00325,HG00326,HG00327,HG00328,HG00329,HG00330,HG00331,HG00332,HG00334,HG00335,HG00336,HG00337,HG00338,HG00339,HG00341,HG00342,HG00343,HG00344,HG00345,HG00346,HG00349,HG00350,HG00351,HG00353,HG00355,HG00356,HG00358,HG00359,HG00360,HG00361,HG00362,HG00364,HG00365,HG00366,HG00367,HG00369,HG00371,HG00372,HG00373,HG00375,HG00376,HG00377,HG00378,HG00379,HG00380,HG00381,HG00382,HG00383,HG00384,HG00096,HG00097,HG00099,HG00100,HG00101,HG00102,HG00103,HG00104,HG00105,HG00106,HG00108,HG00109,HG00110,HG00111,HG00112,HG00114,HG00115,HG00116,HG00117,HG00118,HG00119,HG00120,HG00121,HG00122,HG00123,HG00124,HG00125,HG00126,HG00127,HG00128,HG00129,HG00130,HG00131,HG00132,HG00133,HG00134,HG00135,HG00136,HG00137,HG00138,HG00139,HG00141,HG00142,HG00143,HG00145,HG00146,HG00148,HG00149,HG00150,HG00151,HG00152,HG00154,HG00155,HG00156,HG00157,HG00158,HG00159,HG00160,HG00231,HG00232,HG00233,HG00234,HG00235,HG00236,HG00237,HG00238,HG00239,HG00240,HG00242,HG00243,HG00244,HG00245,HG00246,HG00247,HG00249,HG00250,HG00251,HG00252,HG00253,HG00255,HG00256,HG00257,HG00258,HG00259,HG00260,HG00261,HG00262,HG00263,HG00264,HG00265,HG01334,HG01789,HG01790,HG01791,HG02215,NA20502,NA20503,NA20504,NA20505,NA20506,NA20507,NA20508,NA20509,NA20510,NA20512,NA20513,NA20514,NA20515,NA20516,NA20517,NA20518,NA20519,NA20520,NA20521,NA20524,NA20525,NA20527,NA20528,NA20529,NA20530,NA20531,NA20532,NA20534,NA20535,NA20536,NA20537,NA20538,NA20539,NA20540,NA20541,NA20542,NA20543,NA20544,NA20581,NA20582,NA20585,NA20586,NA20588,NA20589,NA20752,NA20754,NA20756,NA20757,NA20758,NA20759,NA20760,NA20761,NA20765,NA20766,NA20768,NA20769,NA20770,NA20771,NA20772,NA20773,NA20774,NA20778,NA20783,NA20785,NA20786,NA20787,NA20790,NA20792,NA20795,NA20796,NA20797,NA20798,NA20799,NA20800,NA20801,NA20802,NA20803,NA20804,NA20805,NA20806,NA20807,NA20808,NA20809,NA20810,NA20811,NA20812,NA20813,NA20814,NA20815,NA20816,NA20819,NA20826,NA20828

Table S2. HPRC samples used in the KIR allele prediction evaluation

HG00438,HG00621,HG00673,HG00735,HG00741,HG01071,HG01106,HG01175,HG01258,HG01358,HG01361,HG01891,HG01928,HG01952,HG01978,HG02148,HG02257,HG02572,HG02622,HG02630,HG02717,HG02886,HG03453,HG03516,HG03540,HG0357

Table S3. The comparison of PING and T1K on the five samples provided in PING package. The table excludes *KIR3DL1*/*KIR3DS1*, *KIR2DL2*/*KIR2DL3*, *KIR2DS3*/*KIR2DS5* and *KIR2DL5A*/*KIR2DL5B*, as PING is unable to distinguish these gene pairs.

|  | IND00001 | IND00004 | IND00080 | IND00084 | IND00374 |
| --- | --- | --- | --- | --- | --- |
| *KIR3DP1* | T1K+ | = | = | = | = |
| *KIR2DP1* | = | PING- | = | = | = |
| *KIR2DS2* | = | = | = | = | = |
| *KIR2DL4* | = | = | = | = | = |
| *KIR3DL3* | PING++ | = | = | = | = |
| *KIR3DL2* | X | PING++ | = | PING++ | PING++ |
| *KIR2DS4* | = | = | = | = | = |
| *KIR2DL1* | = | = | = | = | = |
| *KIR2DS1* | = | = | = | = | = |

= : PING and T1K had the same prediction for the gene in the corresponding sample

X: the genotyping results were different. This includes the case of one allele matched, the other mismatched.

T1K+: T1K predicted an extra allele

PING-: PING reported “unresolved” on the alleles

PING++: PING reported multiple genotypes (more than 1 allele combination), and T1K’s prediction matched one of them.

Table S4. Running time and memory usage of methods on HLA genotyping. All the methods are tested with 8 threads.

|  |  | T1K | | | arcasHLA | | | OptiType | |
| --- | --- | --- | --- | --- | --- | --- | --- | --- | --- |
| Sample | # of read pairs (million) | Time (min) | Genotyping time (min) | Mem (GB) | Time (min) | Genotyping time (min) | Mem (GB) | Time (min) | Mem (GB) |
| HG00117 | 246 | 89 | 28 | 36 | 41 | 33 | 21 | 157 | 256 |
| HG00355 | 234 | 78 | 23 | 29 | 29 | 22 | 13 | 103 | 185 |
| NA20527 | 231 | 78 | 22 | 30 | 29 | 23 | 13 | 132 | 219 |
| NA19095 | 228 | 79 | 25 | 29 | 27 | 20 | 12 | 116 | 189 |
| NA06986 | 219 | 85 | 28 | 35 | 31 | 23 | 30 | 175 | 268 |
| NA12716 | 100 | 40 | 15 | 20 | 25 | 23 | 13 | 70 | 137 |
| NA19159 | 98 | 37 | 15 | 18 | 17 | 15 | 16 | 30 | 61 |
| NA12399 | 88 | 31 | 10 | 15 | 18 | 15 | 11 | 39 | 84 |
| NA19108 | 75 | 25 | 9 | 13 | 13 | 11 | 7 | 17 | 38 |
| NA18502 | 71 | 24 | 7 | 10 | 11 | 9 | 6 | 26 | 57 |
